# Supplementary material for: Paired organoids from primary gastric cancer and lymphatic metastasis are useful for personalized medicine
Source: PubMed Central journal article supplement — J Transl Med. 2024 Aug 12;22:754. doi: 10.1186/s12967-024-05512-0 (PMC11318189; doi:10.1186/s12967-024-05512-0), 2024-08-12
Supplement: 12967_2024_5512_MOESM1_ESM.pdf [file 12967_2024_5512_MOESM1_ESM.pdf]

## Supplementary files

### Paired organoids from primary gastric cancer and lymphatic metastasis are useful for personalized medicine

Ruixin Yang<sup>1#</sup>, Yao Qi<sup>2#</sup>, Wingyan Kwan<sup>1#</sup>, Yutong Du<sup>1</sup>, Ranlin Yan<sup>1</sup>, Lu Zang<sup>1</sup>, Xuexin Yao<sup>1</sup>, Chen Li<sup>1</sup>, Zhenggang Zhu<sup>1</sup>, Xiaoyan Zhang<sup>2</sup>, Hengjun Gao<sup>2</sup>, Io Hong Cheong<sup>3</sup>, Zisis Kozlakidis<sup>4\*</sup>, Yingyan Yu<sup>1\*</sup>

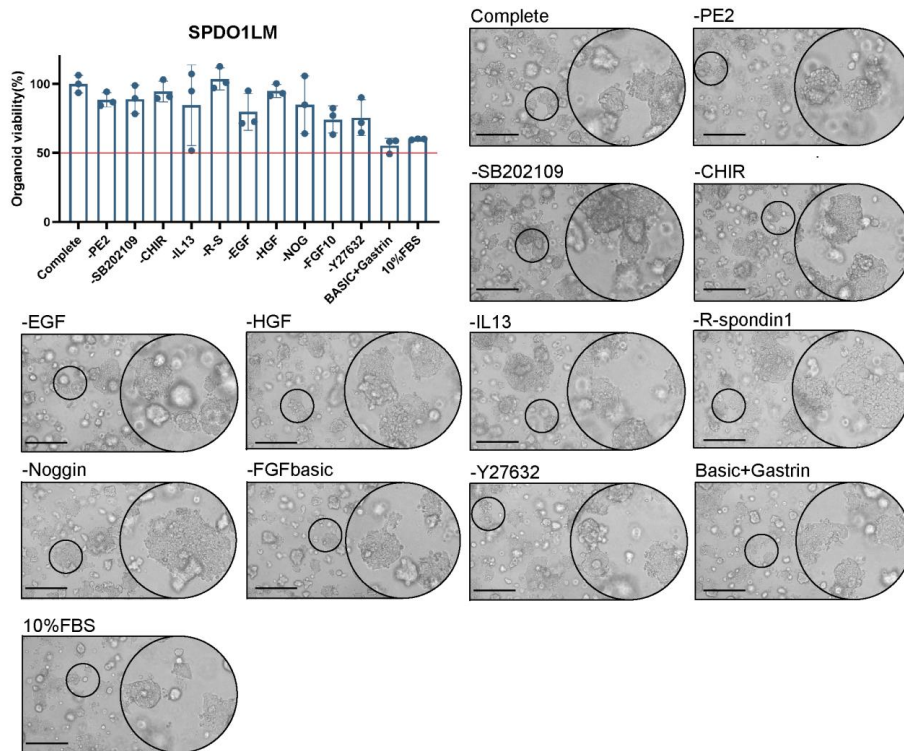

**Figure S1. Analyzing culture medium for SPDO1LM organoid line.** We deleted the components of culture medium of SPDO1LM line according to complete medium, PE2 minus, SB202109 minus, CHIR-99021 minus, IL13 minus, R-spondin 1 minus, EGF minus, HGF minus, noggin minus, FGF-10 minus, Y27632 minus, basic medium with gastrin, and 10% FBS only step-wisely. SPDO1LM organoid grows well in the medium removing related cytokines or small compounds. The cellular vitality of organoids could reach over 50% of the complete medium in the medium covering 10% FBS only, and continuously passaged. Light field, scale bar = 200  $\mu$ m.

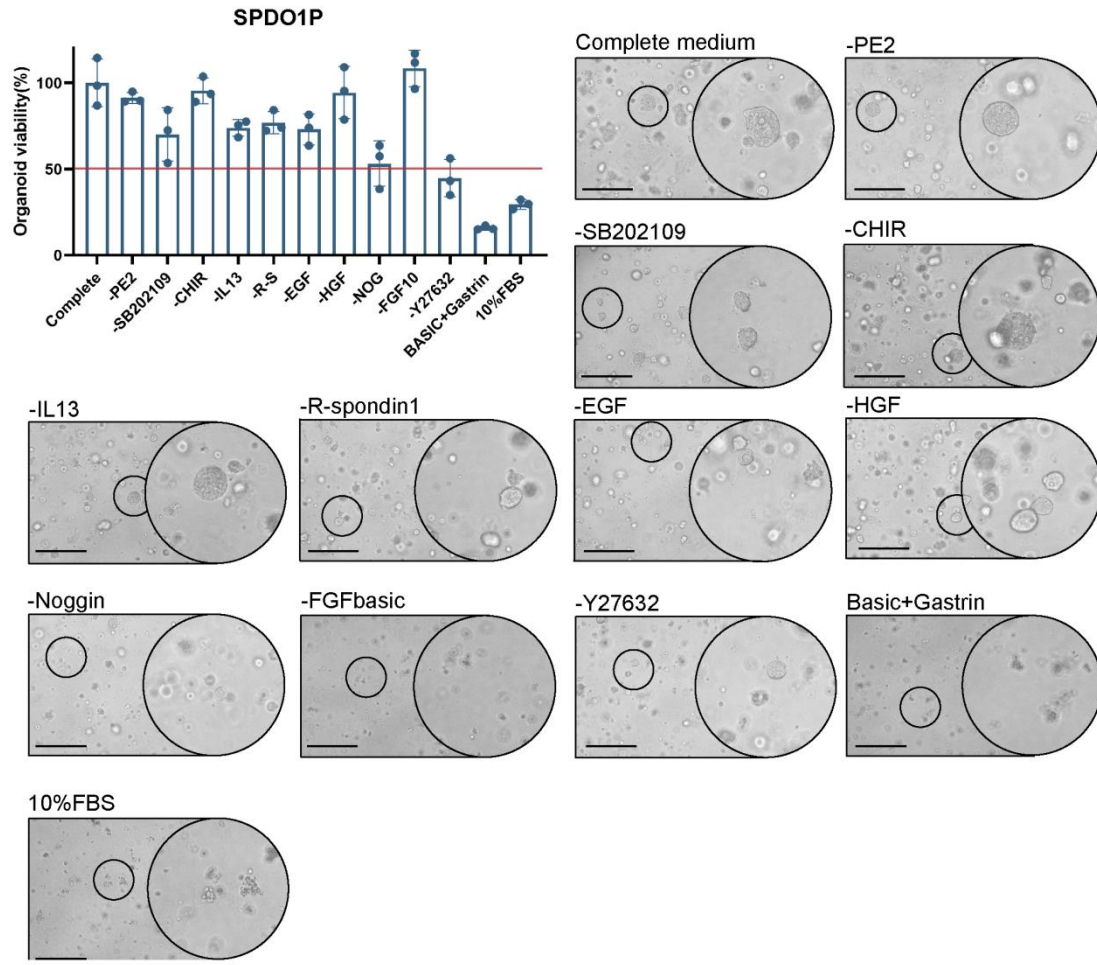

**Figure S2. Analyzing culture medium for SPDO1P organoid line.** We deleted the components of culture medium of SPDO1P line according to complete medium, PE2 minus, SB202109 minus, CHIR-99021 minus, IL13 minus, R-spondin1 minus, EGF minus, HGF minus, noggin minus, FGF-10 minus, Y27632 minus, basic medium with gastrin, and 10% FBS only step-wisely. After removing noggin and Y27632, the cellular vitality of SPDO1P line is significantly decreased. The SPDO1P line can not grow and passage in basic medium with gastrin or 10% FBS-DMEM only. Light field, scale bar = 200  $\mu$ m.

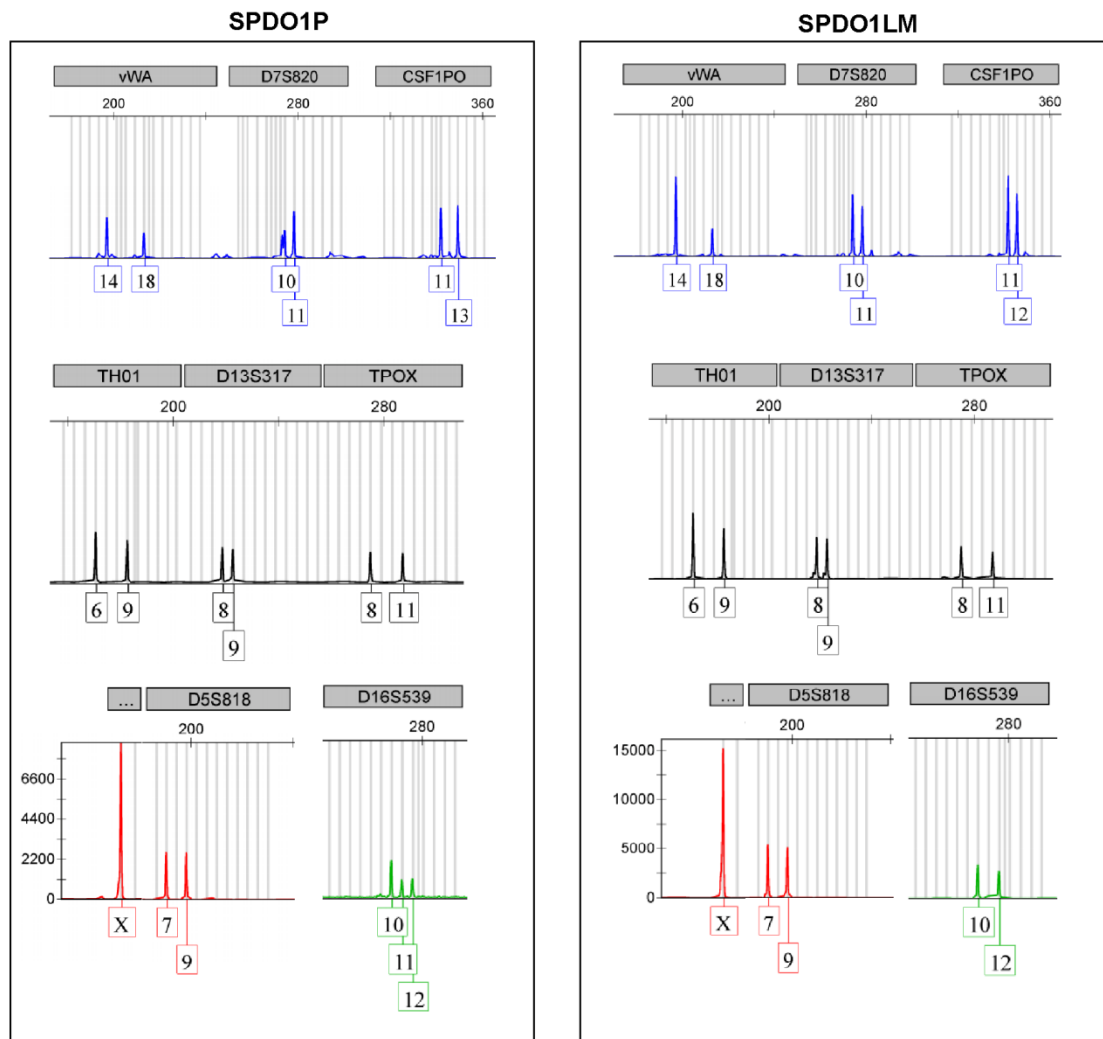

**Figure S3. The chromatograms of STRs assay for SPDO1P and SPDO1LM.** The two organoid lines show the similar peaks at vWA, D7S820, TH01, D13S317, TPOX and amelogenin loci. The peaks at CSF1PO and D16S539 loci show one allele shift.

A

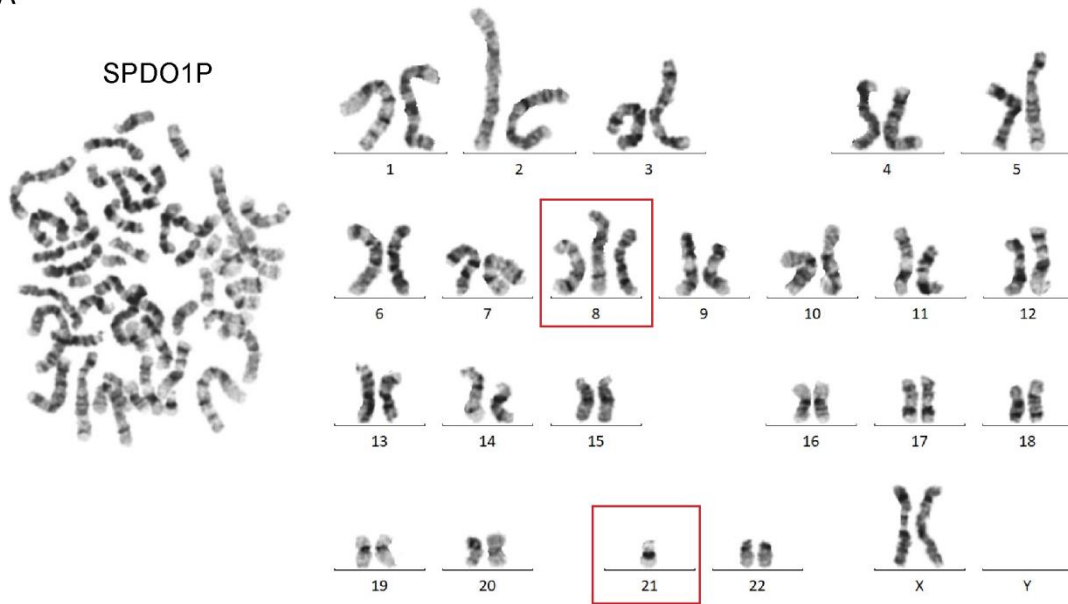

B

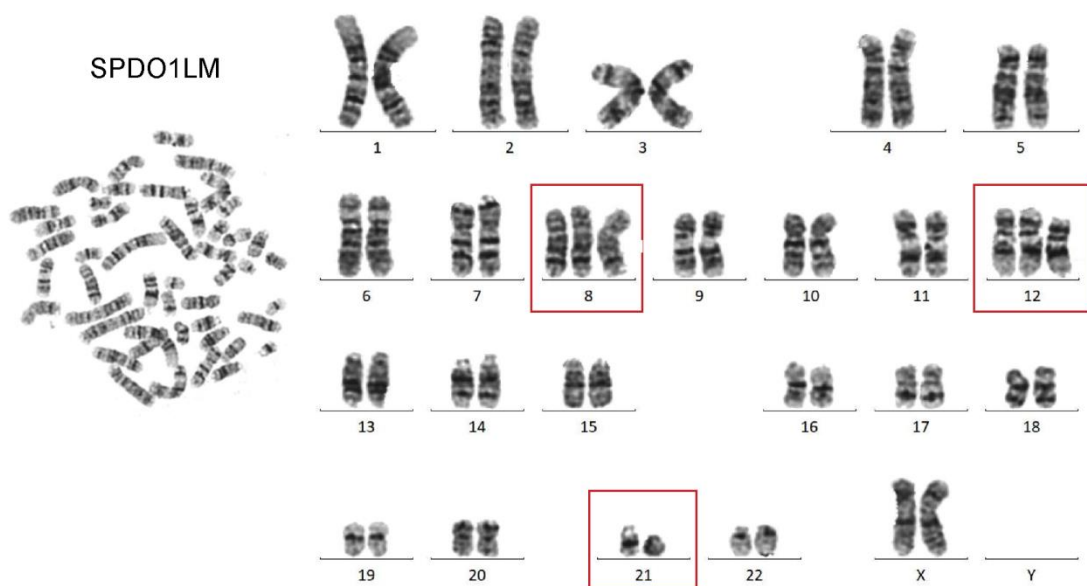

**Figure S4. The karyotypes assay of chromosomes for SPDO1P and SPDO1LM.**

(A) The karyotype of SPDO1P shows 46 chromosomes with an additional chromosome 8 and a chromosome 21 lost. (B) The karyotype of SPDO1LM shows 48 chromosomes with an additional chromosome 8 and a chromosome 12, as well as a circular chromosome 21.

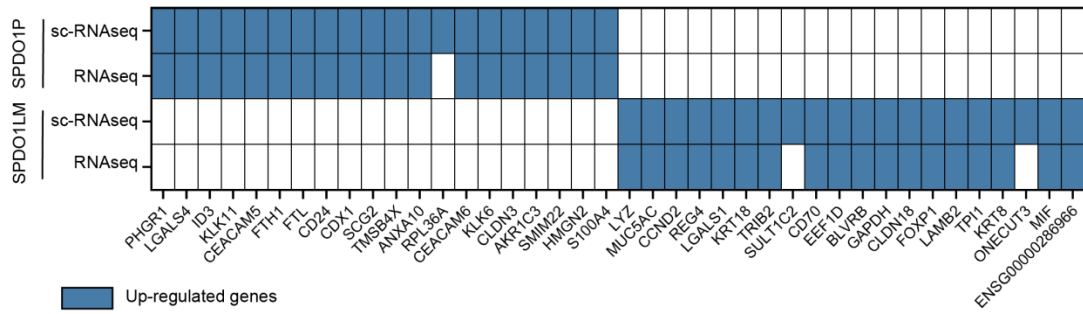

**Figure S5. Heatmap of the top 20 upregulated genes in scRNA-seq and RNA-seq for the two organoids.** The 95% genes (19/20, except RPL36A) are consistently upregulated in SPDO1P. The 90% genes (18/20, except SULT1C2 and ONECUT3) are consistently upregulated in SPDO1LM.

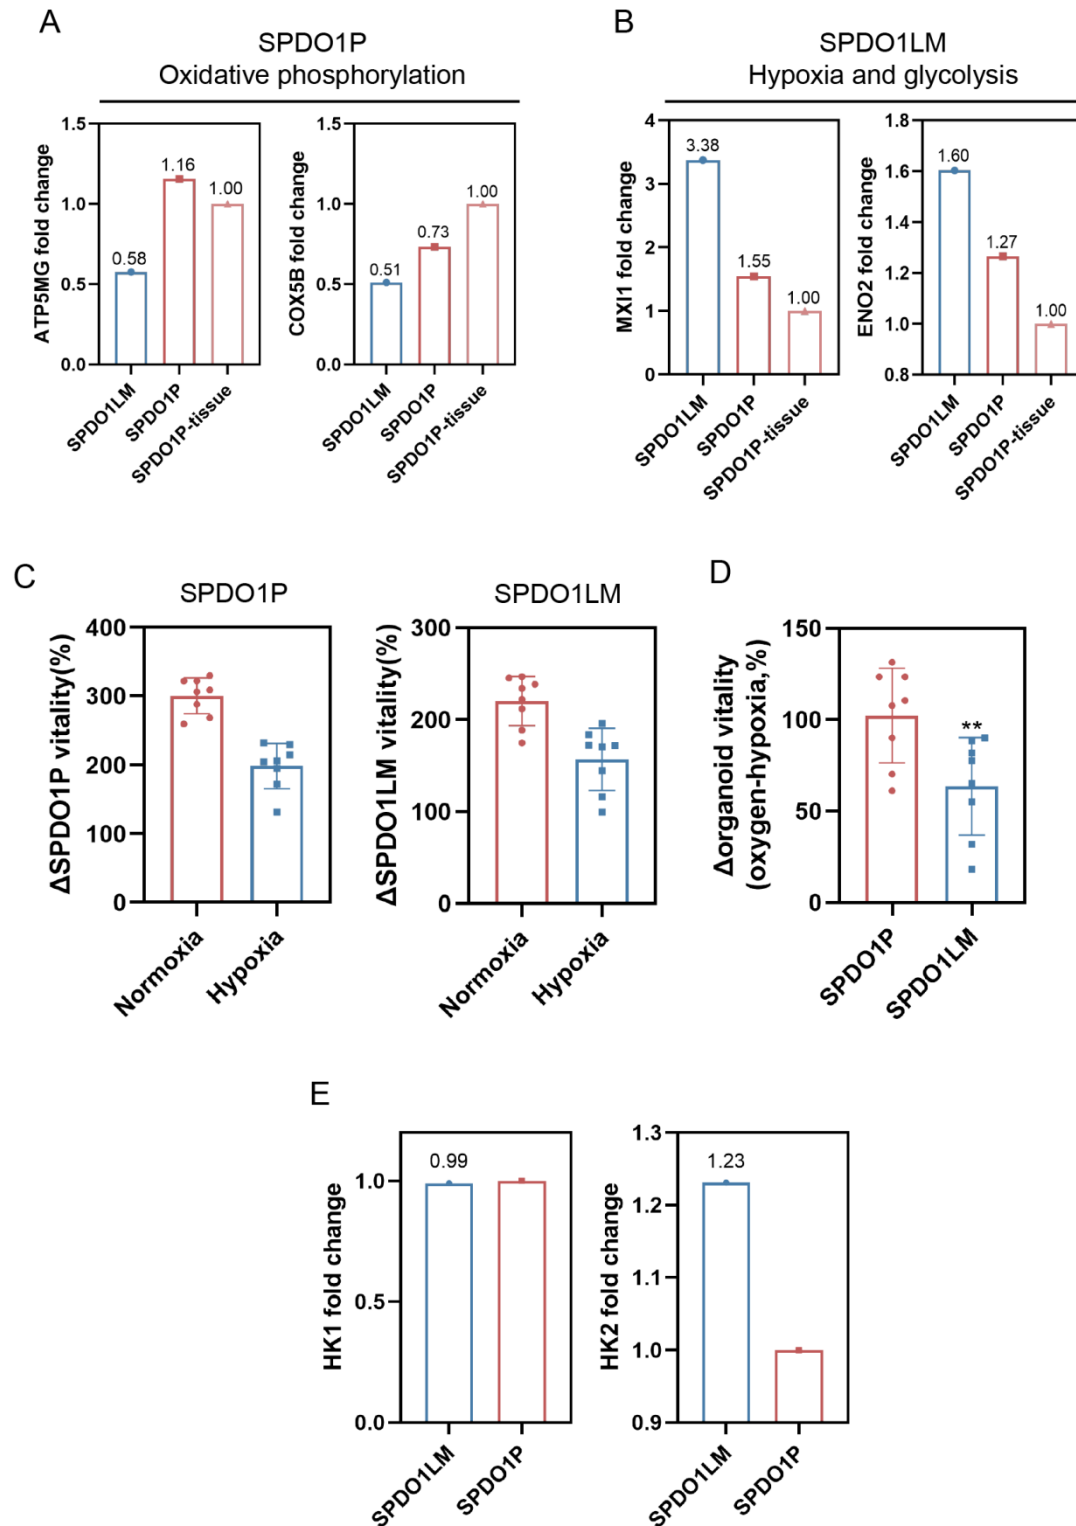

**Figure S6. Examination of oxidative phosphorylation related genes and glycolysis-related genes.** (A) The fold change of ATP5MG and COX5B involved in oxidative phosphorylation on SPDO1LM, SPDO1P and SPDO1P-tissue. (B) The fold

change of MXI1 and ENO2 involved in glycolysis on SPDO1LM, SPDO1P and SPDO1P-tissue. (C)  $\Delta$  SPDO1P vitality and  $\Delta$  SPDO1LM vitality in normoxic and hypoxic condition. (D) The  $\Delta$  organoid vitality of SPDO1P and SPDO1LM in normoxic or hypoxic condition. (E) The fold change of gene expression levels of HK1 and HK2 in SPDO1LM and SPDO1P.

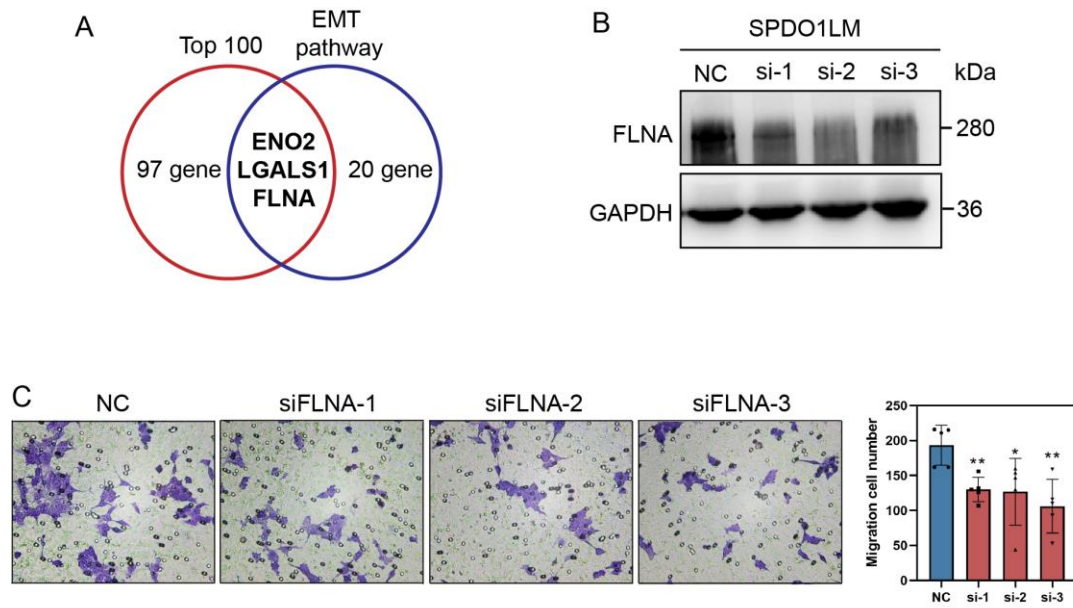

**Figure S7. Biological function analysis of FLNA.** (A) In SPDO1LM, the top 100 upregulation genes intersected with genes of EMT pathway, including ENO2, LGALS1 and FLNA. (B) FLNA knockdown is analyzed by western blot. (C) 2D migration assay upon FLNA knockdown.

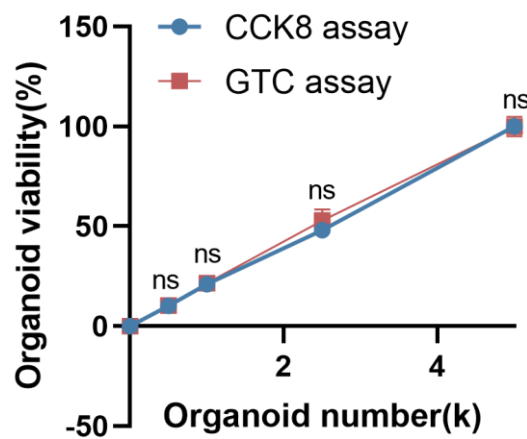

**Figure S8. Comparison of organoid viability and organoid numbers between CCK8 and GTC 3D assays.** There was no statistical difference between CCK8 and GTC 3D methods.

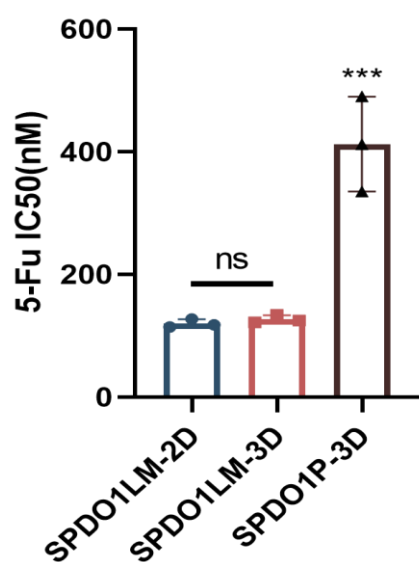

**Figure S9. Examination of 5-Fu IC50 for SPDO1LM-2D, SPDO1LM-3D, and SPDO1P-3D.** There is no significant difference of the IC50 between the SPDO1LM-2D ( $119.70 \pm 5.61$  nM) and SPDO1LM-3D ( $126.67 \pm 5.33$  nM). However, both SPDO1LM-2D and SPDO1LM-3D are sensitive to 5-Fu than SPDO1P line ( $412.47 \pm 61.20$  nM).



**Table S1. Components of complete medium, SPDO1P advanced medium, and SPDO1LM advanced medium**

|            | <b>Component</b>              | <b>Concentration</b> | <b>Cat.</b>   | <b>Supplier</b>          |
|------------|-------------------------------|----------------------|---------------|--------------------------|
|            | <b>Complete medium</b>        |                      |               |                          |
| Basic      | Advanced DMEM/F12             |                      | 12634010      | Thermo Fisher Scientific |
|            | HEPES                         | 10mM                 | 15630130      | Sigma-Aldrich            |
|            | B27                           | 1x                   | 17504044      | Thermo Fisher Scientific |
|            | N2 additive                   | 1x                   | 17502048      | Thermo Fisher Scientific |
|            | GlutaMAX                      | 1x                   | 35050061      | Thermo Fisher Scientific |
|            | Nicotinamide                  | 4mM                  | N0636         | Sigma-Aldrich            |
|            | N-Acetyl-L-cysteine           | 1 $\mu$ M            | A7250-10<br>G | Sigma-Aldrich            |
| Antibiotic | Gastrin                       | 10 nM                | G9145         | Sigma-Aldrich            |
|            | Primocin                      | 1x                   | ant-pm-1      | InvivoGen                |
|            | Penicillin-streptomycin       | 1x                   | 15070063      | Thermo Fisher Scientific |
|            | Mycoplasma removal reagent    | 1x                   | 40607ES0<br>3 | GASEN                    |
|            | EGF                           | 50 ng/ml             | AF-100-15     | PeproTech                |
|            | Noggin                        | 100 ng/ml            | 250-38        | PeproTech                |
|            | R-Spondin1                    | 200 ng/ml            | 120-38        | PeproTech                |
| Cytokines  | FGF-basic                     | 10 ng/ml             | 100-18B       | PeproTech                |
|            | Prostaglandin E2              | 100nM                | 2296          | Tocris Bioscience        |
|            | Y-27632                       | 10 $\mu$ M           | Y0503         | Sigma-Aldrich            |
|            | SB202190                      | 5 $\mu$ M            | S7067         | Sigma-Aldrich            |
|            | HGF                           | 20ng/ml              | 100-39        | PeproTech                |
|            | CHIR-99021                    | 100nM                | SML1046       | Sigma-Aldrich            |
|            | Human IL-13                   | 20ng/ml              | 200-13        | PeproTech                |
|            | <b>SPDO1P advanced medium</b> |                      |               |                          |
| Basic      | Advanced DMEM/F12             |                      | 12634010      | Thermo Fisher Scientific |
|            | HEPES                         | 10mM                 | 15630130      | Sigma-Aldrich            |
|            | B27                           | 1x                   | 17504044      | Thermo Fisher Scientific |
|            | N2 additive                   | 1x                   | 17502048      | Thermo Fisher Scientific |
|            | GlutaMAX                      | 1x                   | 35050061      | Thermo Fisher Scientific |
|            | Nicotinamide                  | 4mM                  | N0636         | Sigma-Aldrich            |
|            | N-Acetyl-L-cysteine           | 1 $\mu$ M            | A7250-10<br>G | Sigma-Aldrich            |
| Antibiotic | Gastrin                       | 10 nM                | G9145         | Sigma-Aldrich            |
|            | Primocin                      | 1x                   | ant-pm-1      | InvivoGen                |
|            | Penicillin-streptomycin       | 1x                   | 15070063      | Thermo Fisher Scientific |
|            | EGF                           | 50 ng/ml             | AF-100-15     | PeproTech                |
| Cytokines  | Noggin                        | 100 ng/ml            | 250-38        | PeproTech                |
|            | R-Spondin1                    | 200 ng/ml            | 120-38        | PeproTech                |
|            | Y-27632                       | 10 $\mu$ M           | Y0503         | Sigma-Aldrich            |
|            | SB202190                      | 5 $\mu$ M            | S7067         | Sigma-Aldrich            |

**SPDO1LM advanced medium**

|            |                         |     |          |                          |
|------------|-------------------------|-----|----------|--------------------------|
| Basic      | Advanced DMEM/F12       |     | 12634010 | Thermo Fisher Scientific |
|            | FBS                     | 0.1 | 10100147 | Gibco                    |
| Antibiotic | Primocin                | 1x  | ant-pm-1 | InvivoGen                |
|            | Penicillin-streptomycin | 1x  | 15070063 | Thermo Fisher Scientific |

---

**Table S2. Basic information of the drug sensitive analysis**

| <b>Drugs</b>   | <b>Cat.</b> | <b>Supplier</b> |
|----------------|-------------|-----------------|
| 5-Fluorouracil | M2289       | AbMole          |
| Oxaliplatin    | MB1174      | Meilunbio       |
| Paclitaxel     | M1970       | AbMole          |

---

**Table S3. Gene mutations of SPDO1P, SPDO1LM and parental tissues**

| SPDO1P          |                   |               |                   | SPDO1LM         |                   |               |                   |
|-----------------|-------------------|---------------|-------------------|-----------------|-------------------|---------------|-------------------|
| Parental tissue |                   | Organoid line |                   | Parental tissue |                   | Organoid line |                   |
| KALRN           | Missense_Mutation | MYH9          | Missense_Mutation | MAP3K13         | Missense_Mutation | KALRN         | Missense_Mutation |
| PIK3C2B         | Missense_Mutation | RAB11FIP5     | Missense_Mutation | LAMA2           | Missense_Mutation | TAOK2         | Missense_Mutation |
| BCL6            | Missense_Mutation | SETD1B        | Missense_Mutation | ARHGAP35        | Missense_Mutation | EFTUD2        | Missense_Mutation |
| BRAF            | Missense_Mutation | LAMA2         | Missense_Mutation | IL21R           | Missense_Mutation | FAT3          | Missense_Mutation |
| SETD1B          | Missense_Mutation | TFE3          | Missense_Mutation | SRRM2           | Missense_Mutation | LAMA2         | Missense_Mutation |
| LAMA2           | Missense_Mutation | MYO5A         | Missense_Mutation | EPHA7           | Missense_Mutation | DCTN1         | Missense_Mutation |
| ANK1            | Missense_Mutation | LARP4B        | Missense_Mutation | ROBO2           | Missense_Mutation | IL21R         | Missense_Mutation |
| GNAI1           | Missense_Mutation | MAP4          | Missense_Mutation | VHL             | Missense_Mutation | ARHGEF2       | Missense_Mutation |
| STAG2           | Missense_Mutation | IL21R         | Missense_Mutation | KAT6B           | Missense_Mutation | SRRM2         | Missense_Mutation |
| IL21R           | Missense_Mutation | ERBB2         | Missense_Mutation | FAT3            | Missense_Mutation | EPHA7         | Missense_Mutation |
| JMJD1C          | Missense_Mutation | PTPRF         | Missense_Mutation | SETD1B          | Missense_Mutation | MYO5A         | Missense_Mutation |
| SRRM2           | Missense_Mutation | FAT4          | Missense_Mutation | PRPF8           | Missense_Mutation | FAT4          | Missense_Mutation |
| EPHA7           | Missense_Mutation | FGFR2         | Missense_Mutation | ERBB3           | Missense_Mutation | BRD4          | Missense_Mutation |
| MYO5A           | Missense_Mutation | CLASP2        | Missense_Mutation | LZTR1           | Missense_Mutation | KAT6B         | Missense_Mutation |
| PTPRC           | Splice_Site       | KAT6B         | Missense_Mutation | ZNF703          | Missense_Mutation | SETD1B        | Missense_Mutation |
| BCL9            | Missense_Mutation | EP300         | Missense_Mutation | GOT2            | Missense_Mutation | PRPF8         | Missense_Mutation |
| FAT4            | Missense_Mutation | PRPF8         | Missense_Mutation | LRP1B           | Missense_Mutation | ERBB3         | Missense_Mutation |
| BRD4            | Missense_Mutation | ERBB3         | Missense_Mutation | CALR            | Missense_Mutation | AKT1          | Missense_Mutation |
| KAT6B           | Missense_Mutation | PIP5K1A       | Splice_Site       | COL1A1          | Missense_Mutation | LRP1B         | Missense_Mutation |
| CIC             | Frame_Shift_Ins   | CACNA1D       | Missense_Mutation | SYNE1           | Nonsense_Mutation | EXT2          | Missense_Mutation |
| POLD1           | Missense_Mutation | CEP89         | Missense_Mutation | EPPK1           | Missense_Mutation | ZNF703        | Missense_Mutation |
| ACSL6           | Missense_Mutation | LRP1B         | Missense_Mutation | NCKIPSD         | Missense_Mutation | CEP89         | Missense_Mutation |
| ERBB3           | Missense_Mutation | PLXNB2        | Missense_Mutation | DLG1            | Missense_Mutation | MGAM          | Missense_Mutation |
| AKT1            | Missense_Mutation | MUC16         | Missense_Mutation | FGFR2           | Missense_Mutation | ARID1A        | Missense_Mutation |
| CCAR1           | Missense_Mutation | SRGAP3        | Missense_Mutation | MYCBP2          | Missense_Mutation | UHRF1BP1L     | Missense_Mutation |
| ZNF703          | Missense_Mutation | DLG1          | Missense_Mutation | ZMYM2           | Missense_Mutation | MUC16         | Missense_Mutation |
| CEP89           | Missense_Mutation | BRAF          | Missense_Mutation | RASGRP1         | Missense_Mutation | SYNE1         | Nonsense_Mutation |
| LRP1B           | Missense_Mutation | PIM1          | Missense_Mutation | MAGI2           | Missense_Mutation | DLG1          | Missense_Mutation |
| LTBP1           | Missense_Mutation | TLX3          | Missense_Mutation | LRRK2           | Nonsense_Mutation | MN1           | Missense_Mutation |
| SYNE1           | Nonsense_Mutation | NSD1          | Missense_Mutation | SVEP1           | Missense_Mutation | SMARCB1       | Missense_Mutation |
| TET2            | Missense_Mutation | AKT1          | Missense_Mutation | EPHB6           | Missense_Mutation | FGFR2         | Missense_Mutation |
| EPPK1           | Missense_Mutation | MYH10         | Missense_Mutation | CEP89           | Missense_Mutation | MYCBP2        | Missense_Mutation |
| DLG1            | Missense_Mutation | MAGI2         | Missense_Mutation | EPHA1           | Missense_Mutation | GOLGA5        | Missense_Mutation |
| MUC16           | Missense_Mutation | DNMT1         | Missense_Mutation | ITGA9           | Missense_Mutation | MAGI2         | Missense_Mutation |
| SMARCB1         | Missense_Mutation | SVEP1         | Missense_Mutation | PAX3            | Missense_Mutation | DMD           | Missense_Mutation |
| FGFR2           | Missense_Mutation | SMCHD1        | Missense_Mutation | MYH10           | Missense_Mutation | LRRK2         | Nonsense_Mutation |
| MYCBP2          | Missense_Mutation | POLE          | Missense_Mutation | CTCF            | Nonsense_Mutation | SVEP1         | Missense_Mutation |
| GOLGA5          | Missense_Mutation | TSHR          | Missense_Mutation | NOTCH2          | Missense_Mutation | CRTC1         | Missense_Mutation |
| MAGI2           | Missense_Mutation | SPEG          | Missense_Mutation | PREX2           | Missense_Mutation | TTK           | Missense_Mutation |
| SVEP1           | Missense_Mutation | EPHA1         | Missense_Mutation | TRIM7           | Missense_Mutation | SPEG          | Missense_Mutation |

|          |                   |         |                   |         |                   |          |                   |
|----------|-------------------|---------|-------------------|---------|-------------------|----------|-------------------|
| MDN1     | Missense_Mutation | LRRK2   | Nonsense_Mutation | NAV1    | Missense_Mutation | EPHA1    | Missense_Mutation |
| SPEG     | Missense_Mutation | PIK3C2B | Missense_Mutation | MUC16   | Missense_Mutation | TCF4     | Missense_Mutation |
| EPHA1    | Missense_Mutation | PAX3    | Missense_Mutation | PTPRT   | Missense_Mutation | CSMD3    | Missense_Mutation |
| LRRK2    | Nonsense_Mutation | IRS2    | Missense_Mutation | FAT4    | Missense_Mutation | KDR      | Missense_Mutation |
| TCF4     | Missense_Mutation | CTCF    | Nonsense_Mutation | ZNF132  | Missense_Mutation | PAX3     | Missense_Mutation |
| CLASP2   | Missense_Mutation | COL18A1 | Missense_Mutation | TSC2    | Missense_Mutation | CTCF     | Nonsense_Mutation |
| PAX3     | Missense_Mutation | CHD8    | Missense_Mutation | FLNA    | Missense_Mutation | SETBP1   | Missense_Mutation |
| CTCF     | Nonsense_Mutation | PREX2   | Missense_Mutation | SPEG    | Missense_Mutation | PREX2    | Missense_Mutation |
| ZNF292   | Missense_Mutation | SYNE1   | Nonsense_Mutation | CACNA1D | Missense_Mutation | HCFC1    | Missense_Mutation |
| PREX2    | Missense_Mutation | HCFC1   | Missense_Mutation | CIC     | Frame_Shift_Ins   | TOP3A    | Missense_Mutation |
| SETBP1   | Missense_Mutation | WASF3   | Missense_Mutation | CDKN1B  | Frame_Shift_Del   | KIAA1109 | Missense_Mutation |
| TOP3A    | Missense_Mutation | KRAS    | Missense_Mutation | KMT2B   | Frame_Shift_Ins   | POLD1    | Missense_Mutation |
| MGAM     | Missense_Mutation | SMC1A   | Missense_Mutation |         |                   | KRAS     | Missense_Mutation |
| KRAS     | Missense_Mutation | PTPRT   | Missense_Mutation |         |                   | CASP9    | Missense_Mutation |
| CASP9    | Missense_Mutation | NOTCH2  | Missense_Mutation |         |                   | PTPRT    | Missense_Mutation |
| PTPRT    | Missense_Mutation | JAK3    | Missense_Mutation |         |                   | CACNA1D  | Missense_Mutation |
| DNMT3A   | Missense_Mutation | NFATC4  | Missense_Mutation |         |                   | ZNF132   | Missense_Mutation |
| ZNF132   | Missense_Mutation | ZNF132  | Missense_Mutation |         |                   | FLNA     | Missense_Mutation |
| ARHGAP35 | Missense_Mutation | CASP8   | Missense_Mutation |         |                   | EPPK1    | Missense_Mutation |
| FLNA     | Missense_Mutation | PIK3CA  | Missense_Mutation |         |                   | FAT1     | Missense_Mutation |
| FAT3     | Missense_Mutation | FAT1    | Missense_Mutation |         |                   | CIC      | Frame_Shift_Ins   |
| FAT1     | Missense_Mutation | CIC     | Frame_Shift_Ins   |         |                   | CDKN1B   | Frame_Shift_Del   |
| CACNA1D  | Missense_Mutation |         |                   |         |                   | KMT2B    | Frame_Shift_Ins   |
| PRPF8    | Missense_Mutation |         |                   |         |                   |          |                   |

---

**Table S4. Upregulated pathways of SPDO1LM and SPDO1P by GSEA**

| Upregulated pathways in SPDO1LM line |             |             |
|--------------------------------------|-------------|-------------|
| Pathways                             | NES         | P value     |
| HYPOXIA                              | 1.908967871 | 2.19E-05    |
| EPITHELIAL_MESENCHYMAL_TRANSITION    | 1.863697467 | 0.00038268  |
| GLYCOLYSIS                           | 1.706351405 | 0.000707662 |
| COAGULATION                          | 1.696646134 | 0.002850029 |
| APOPTOSIS                            | 1.689650696 | 0.001798553 |
| ANGIOGENESIS                         | 1.624695307 | 0.02353202  |
| IL2_STAT5_SIGNALING                  | 1.608993477 | 0.003016902 |
| PI3K_AKT_MTOR_SIGNALING              | 1.580752483 | 0.011457187 |
| P53_PATHWAY                          | 1.580626188 | 0.003155236 |
| Upregulated pathways in SPDO1P line  |             |             |
| Pathways                             | NES         | P value     |
| OXIDATIVE_PHOSPHORYLATION            | 2.193680594 | 1.32E-10    |
| MYC_TARGETS_V1                       | 1.811704218 | 4.47E-06    |
| E2F_TARGETS                          | 1.748947836 | 8.51E-05    |
| TGF_BETA_SIGNALING                   | 1.594527816 | 0.009737311 |
| DNA_REPAIR                           | 1.46178747  | 0.00836816  |
| G2M_CHECKPOINT                       | 1.437581198 | 0.011323814 |
| INTERFERON_GAMMA_RESPONSE            | 1.403246896 | 0.020619045 |
